# Supplementary material
Source: PubMed Central journal article supplement (PMC5690838)

## Supplemental Information 1

(a) Normalized Mps-1 mRNA levels derived from the TCGA database (mesothelioma, provisional), grouped according to tumor histology in epithelioid MM (E) and non-epithelioid MM (Non-E; which includes biphasic, sarcomatoid, and diffuse MM –as per TCGA classification). A statistically significant difference is observed (\*\*,  $P < 0.01$ ).

(b) Normalized Mps-1 mRNA levels, derived from the TCGA database, grouped according to the international TNM classification of staging (T1 to T4). No statistically significant difference is observed.

**a**

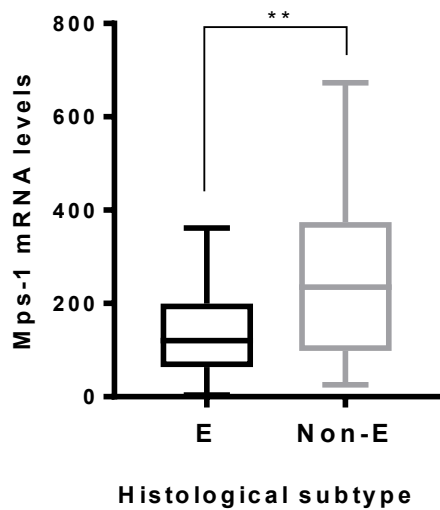

**b**

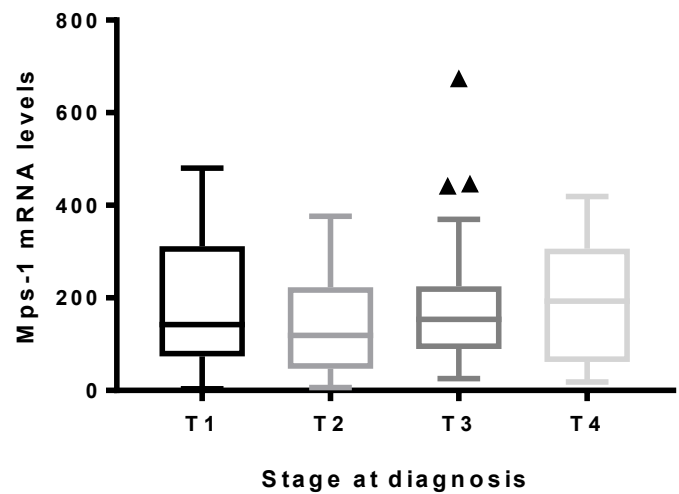

Supplement: NIHMS885962-supplement-1.pdf [file NIHMS885962-supplement-1.pdf]
