# Supplementary material
Source: PubMed Central journal article supplement (PMC5690838)

## Supplemental Information 2

Representative microphotographs of normal/abnormal mitotic cell divisions upon CFI-402257 treatment. MM cells were treated with 100 nM CFI-402257 or DMSO for 24 hr and 48 hr, and then stained with DAPI (blue) and  $\alpha$ -tubulin (red).

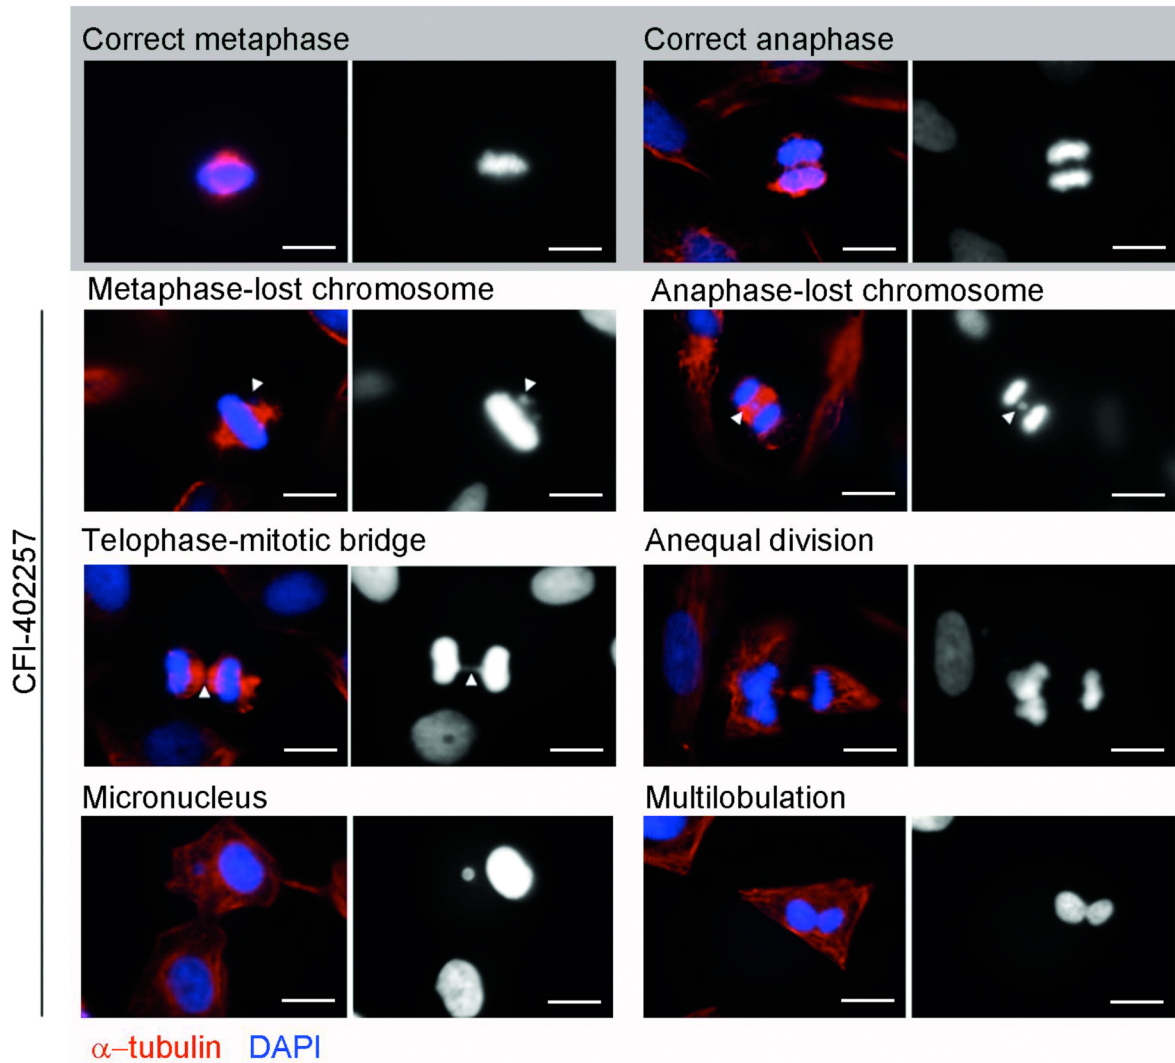

Supplement: NIHMS885962-supplement-2.pdf [file NIHMS885962-supplement-2.pdf]
