# Supplementary material
Source: PubMed Central journal article supplement (PMC5690838)

### Supplemental Information 3

Flow cytometry histograms of DNA content in Mill, Hmeso and Phi cells treated with DMSO, 100 nM or 3  $\mu$ M CFI-402257 for 72 hr. Gate P4 indicates the population with 8N DNA content based on which the polyploid population was assessed.

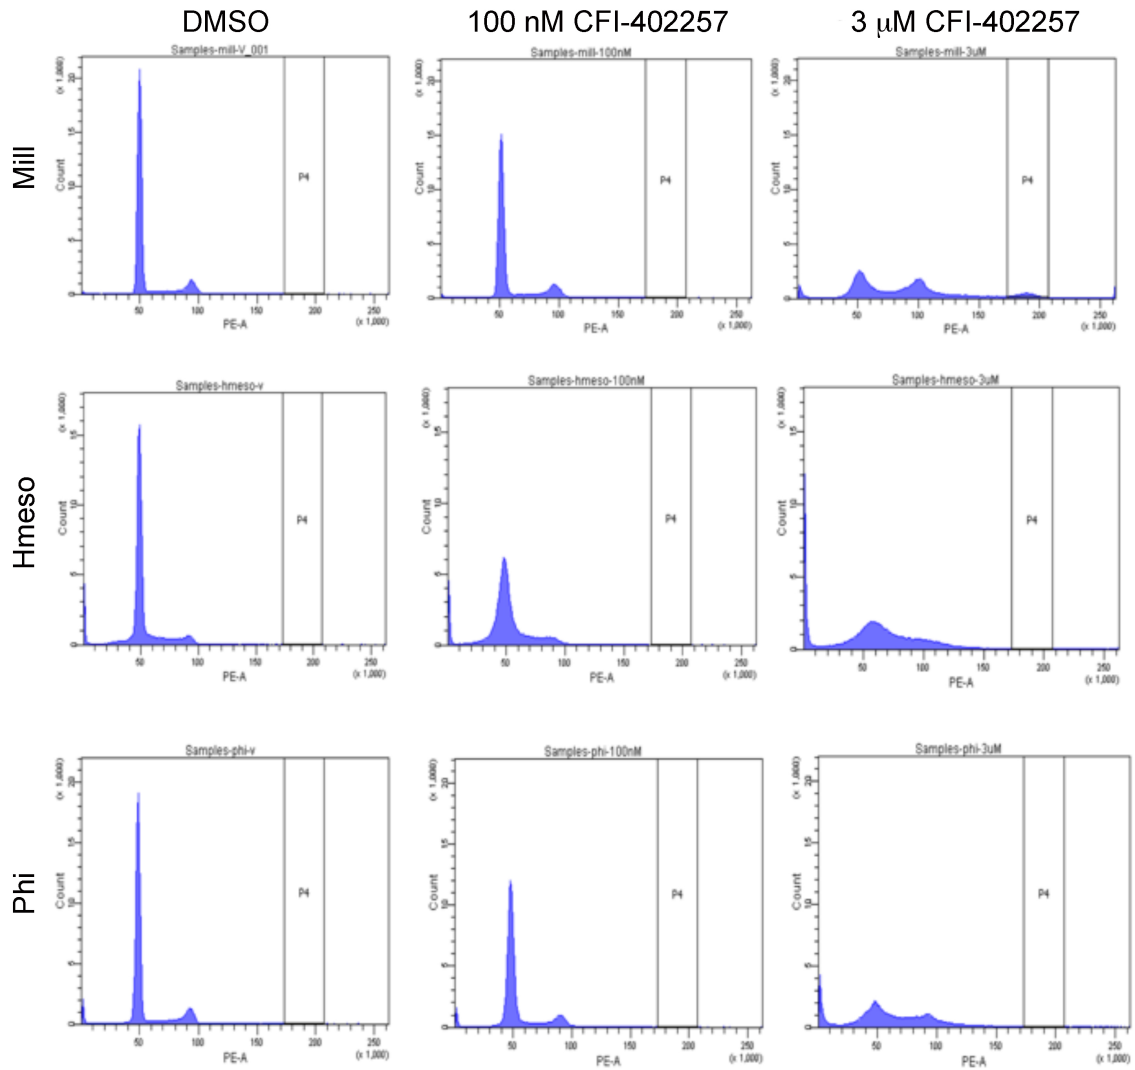

Supplement: NIHMS885962-supplement-3.pdf [file NIHMS885962-supplement-3.pdf]
