# Supplementary material
Source: PubMed Central journal article supplement (PMC5690838)

## Supplemental Information 4

The ability of MM cell lines to form colony in soft agar was evaluated under treatment with 10 nM and 100 nM CFI-402257 or DMSO. Colonies were counted in 3 independent wells per each condition. The graphs represent average colony number expressed as percentage of vehicle.

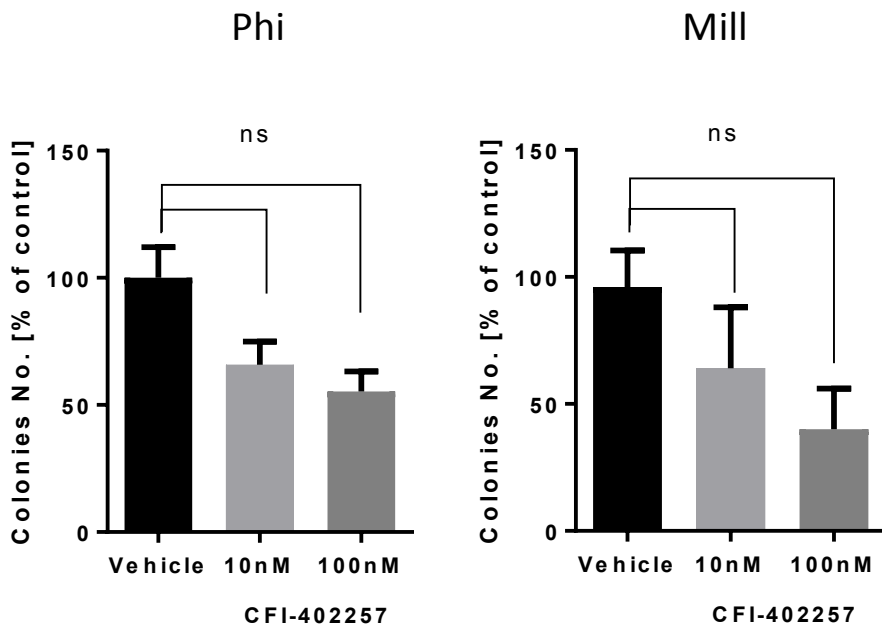

Supplement: NIHMS885962-supplement-4.pdf [file NIHMS885962-supplement-4.pdf]
