# Supplementary material
Source: PubMed Central journal article supplement (PMC5690838)

## Supplemental Information 5

(a) AB12, mouse MM cell line was treated, *in vitro*, with increasing concentrations of CFI-402257. Alamar Blue viability assay was performed after 5 days of treatment. (b) BALB/c mice were injected i.p. with AB12 cells and treated as indicated below. Body mass was measured starting at day 7, when tumors were detected by IVIS, till day 35, the last day of tumor measurement. Values are shown as mean percentage of body mass, relative to first measurement. (c, d) Survival curves: (c) Vehicle (polyethylene glycol –PEG) vs CFI-402257; (d) Cis/Pem (days 7-21) followed by PEG vs. Cis/Pem (days 7-21) followed by CFI-402257. \*By day 50, survival differences between different groups, had remained statistically significant for over 1 week, thus, mice were sacrificed, as per IACUC requirement.

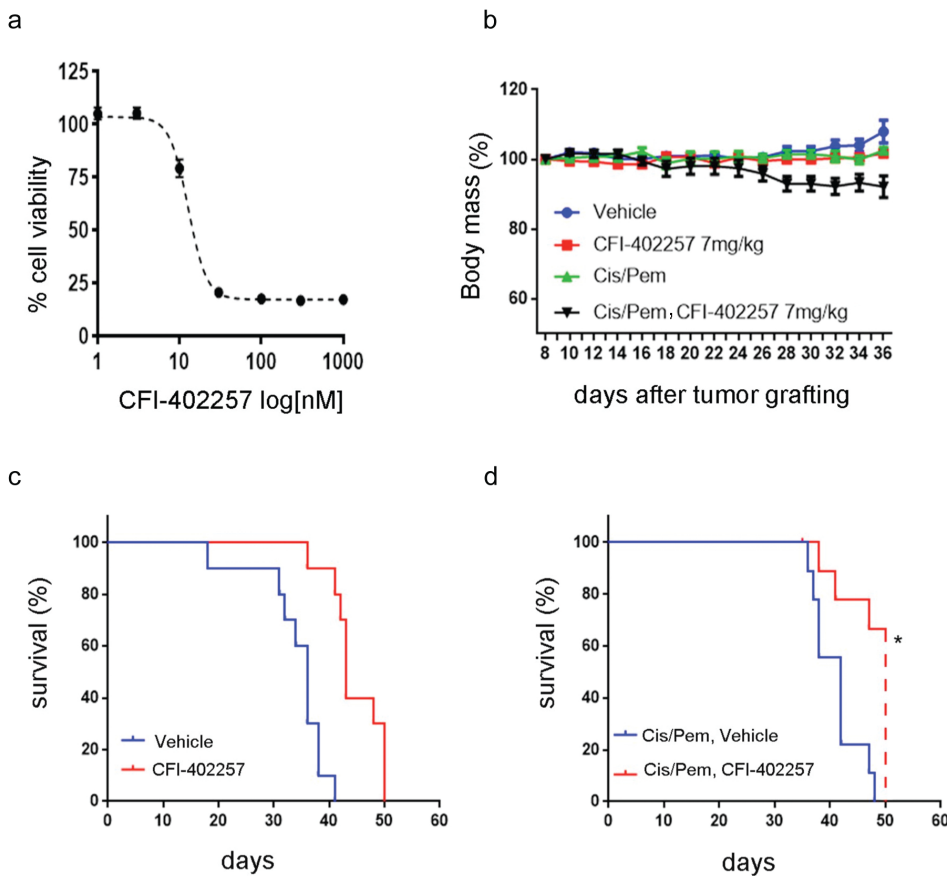

Supplement: NIHMS885962-supplement-5.pdf [file NIHMS885962-supplement-5.pdf]
